# Supplementary material for: Identifying Drug Candidates for COVID-19 with Large-Scale Drug Screening
Source: MDPI journal article supplement (doi:10.3390/ijms24054397), 2023-02-23
Supplement: s1 [file s1]

## Supplementary Material

**Table S1. H-bond strength of the top three compounds and the residues (kcal/mol)**

| Residue | F3077-0136         | F2883-0639         | F0514-5148         |
|---------|--------------------|--------------------|--------------------|
| Asp164  |                    |                    | H-bond<br>(-7.74)  |
| Arg166  | H-bond<br>(-32.92) |                    | H-bond<br>(-12.53) |
| Asn267  |                    | H-bond<br>(-9.23)  | H-bond<br>(-3.67)  |
| Tyr268  |                    | H-bond<br>(-9.58)  |                    |
| Tyr273  | H-bond<br>(-23.59) | H-bond<br>(-10.86) |                    |
| Thr301  |                    | H-bond<br>(-9.68)  |                    |
| Asp302  | H-bond<br>(-31.52) |                    |                    |

**Table S2. The other six candidates with better binding energies than the control group**

| Compound   | Binding Energy (kcal/mol) |
|------------|---------------------------|
| F3166-0258 | -88.56                    |
| F3222-1354 | -88.52                    |
| F1827-0078 | -88.40                    |
| F3166-0259 | -88.34                    |
| F3222-3821 | -88.17                    |
| F1614-0151 | -88.07                    |

**Table S3. The interactions between the six compounds and the residues on BL2 loop**

| Compound   | Asn267 | Tyr268                                     | Gln269 |
|------------|--------|--------------------------------------------|--------|
| F3166-0258 | -      | -                                          | -      |
| F3222-1354 | H-bond | H-bond<br>pi-pi stacking                   | H-bond |
| F1827-0078 | -      | pi-pi stacking<br>pi-pi stacking           | -      |
| F3166-0259 | -      | pi-pi stacking<br>pi-pi stacking           | H-bond |
| F3222-3821 | H-bond | H-bond                                     | -      |
| F1614-0151 | -      | H-bond<br>pi-pi stacking<br>pi-pi stacking | -      |

“-” represents no interaction

**Table S4.** Selected Qikprop descriptors of the six compounds

| <b>Compound</b> | <b>mol_MW<sup>1</sup></b> | <b>QPlogS<sup>2</sup></b> | <b>RO5<sup>3</sup></b> | <b>RO3<sup>4</sup></b> |
|-----------------|---------------------------|---------------------------|------------------------|------------------------|
| F3166-0258      | 578.026                   | -8.023                    | 2                      | 1                      |
| F3222-1354      | 418.512                   | -6.764                    | 0                      | 1                      |
| F1827-0078      | 424.517                   | -5.231                    | 0                      | 0                      |
| F3166-0259      | 549.025                   | -3.535                    | 1                      | 0                      |
| F3222-3821      | 551.634                   | -8.871                    | 2                      | 1                      |
| F1614-0151      | 432.499                   | -5.697                    | 0                      | 0                      |

1 mol\_MW represents molecular weight of the molecule. The recommended range is 130.0–725.0.

2 QPlogS is the predicted aqueous solubility. The recommended range is –6.5~0.5.

3 RO5: number of violations of Lipinski's rule of five. The recommended range: maximum is 4.

4 RO3: number of violations of Jorgensen's rule of three. The recommended range: maximum is 3.

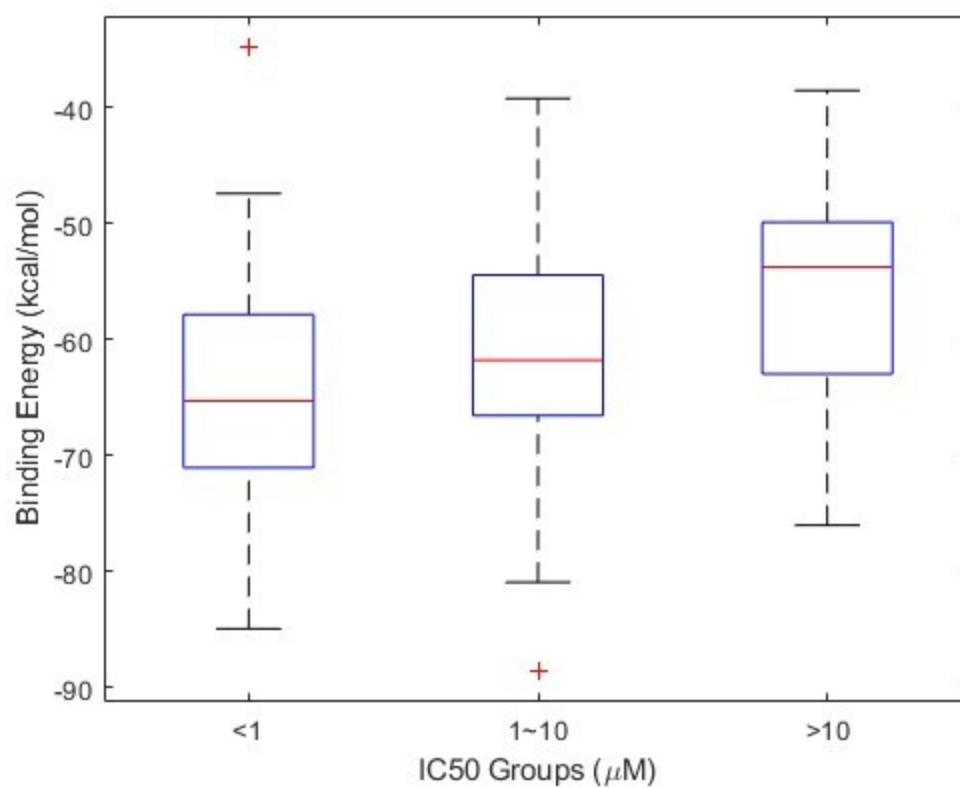

**Figure S1.** Box plots of binding energies of the compounds published in the paper [16] categorized by IC<sub>50</sub> groups.

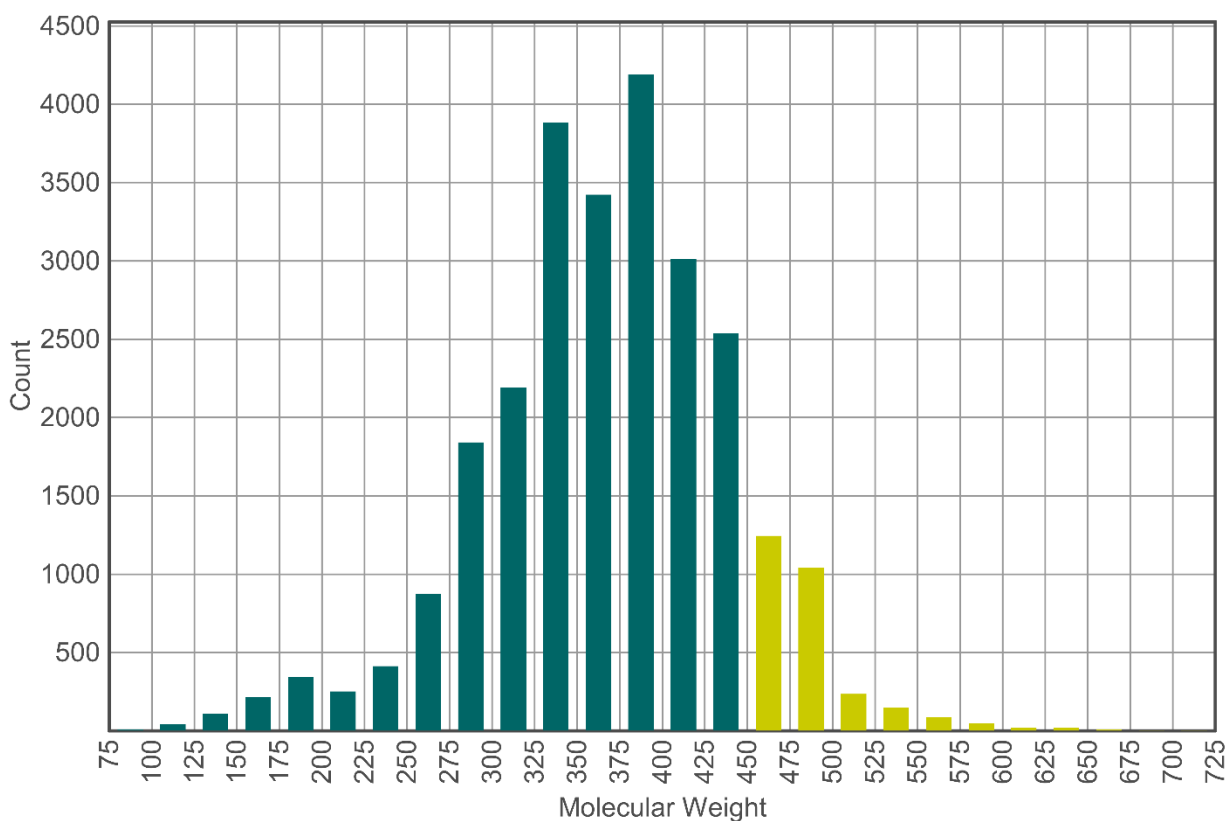

**Figure S2** Distribution of molecular weight in the tested compounds. The green part represents that the data falls within the recommended range.

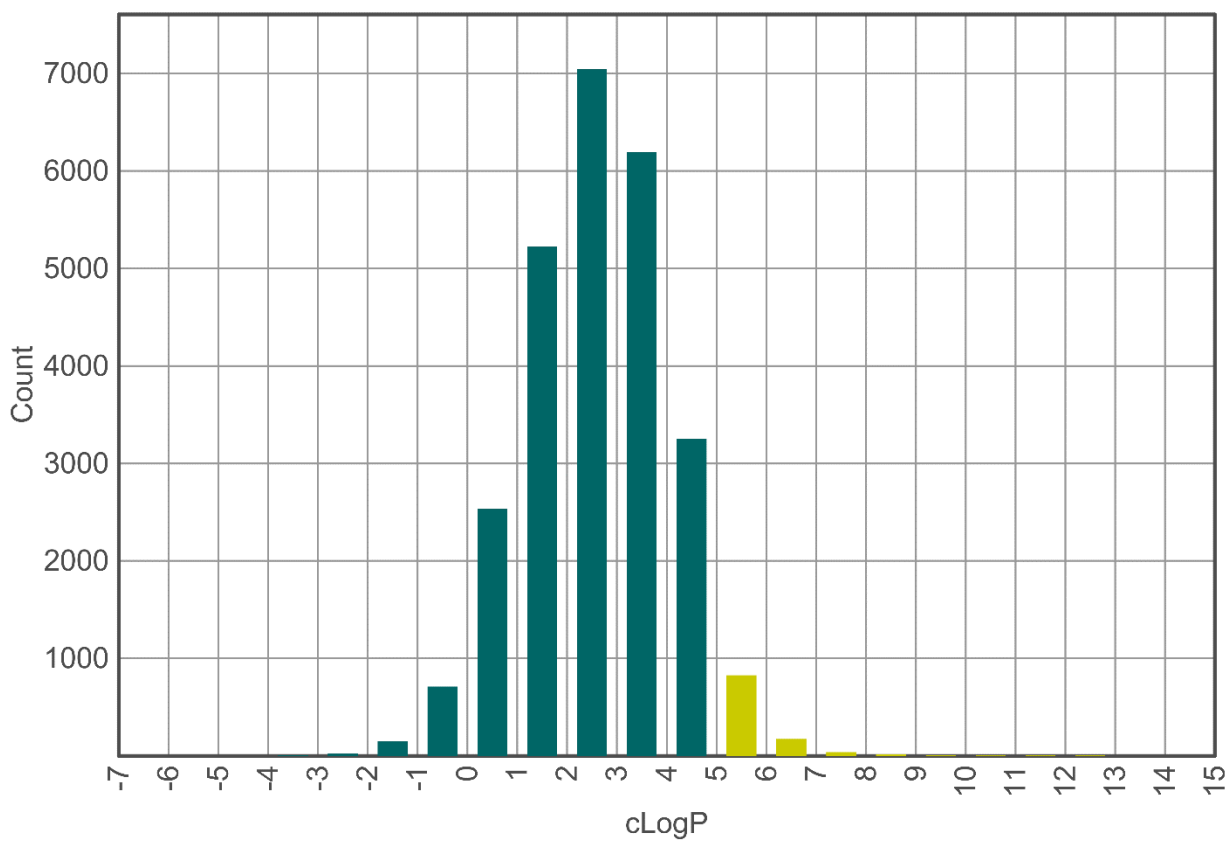

**Figure S3** Distribution of calculated LogP in the tested compounds. The green part represents that the data falls within the recommended range.

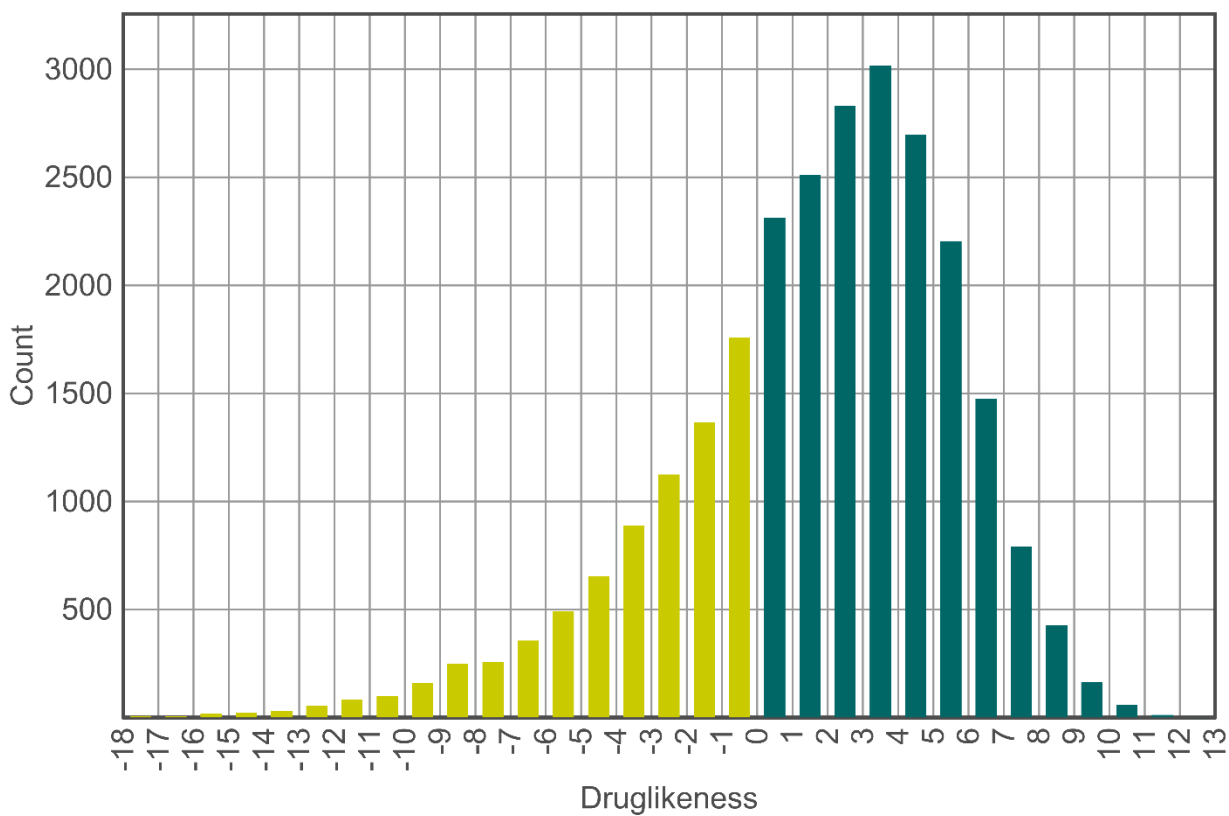

**Figure S4** Distribution of druglikeness values in the tested compounds. The green part represents that the data falls within the recommended range.

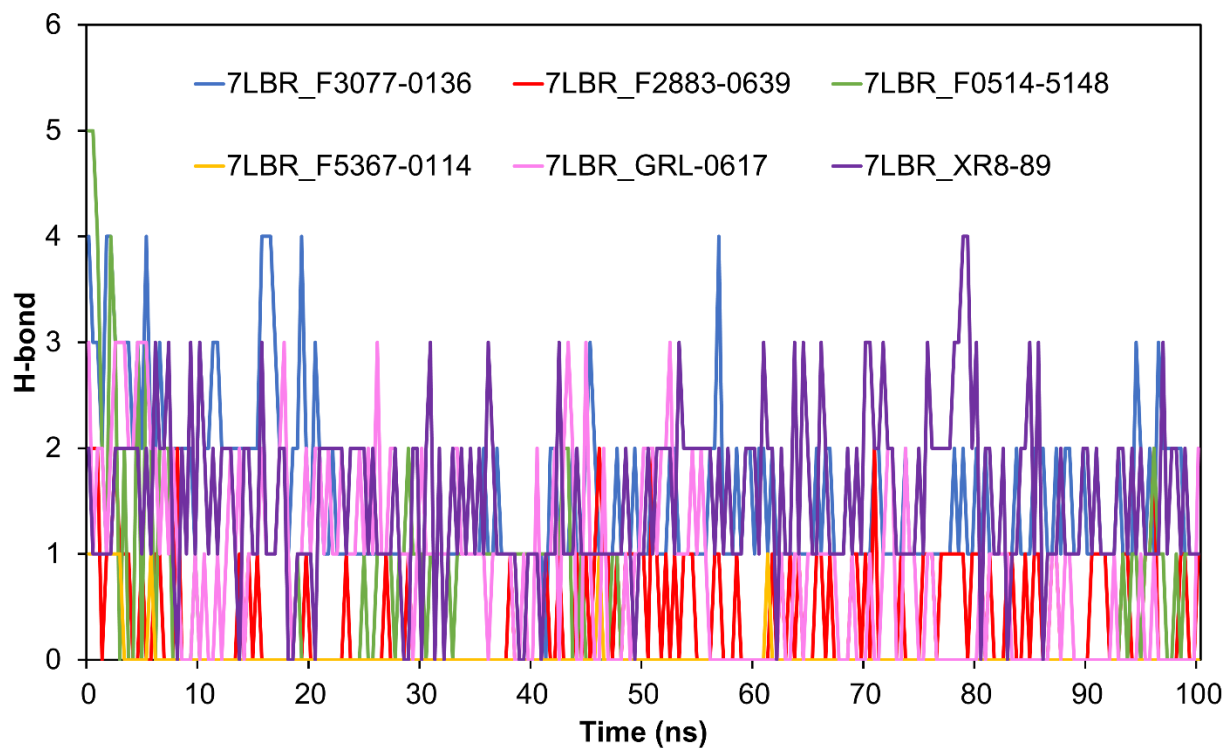

**Figure S5** The comparison of H-bond of protein-ligand complexes. The blue, red, green, yellow, pink, and purple lines represent the energies of complexes: 7LBR\_F3077-0136, 7LBR\_F2883-0639, 7LBR\_F0514-5148, 7LBR\_F5367-0114, 7LBR\_GRL-0617, and the cocrystal structure 7LBR\_XR8-89, respectively.

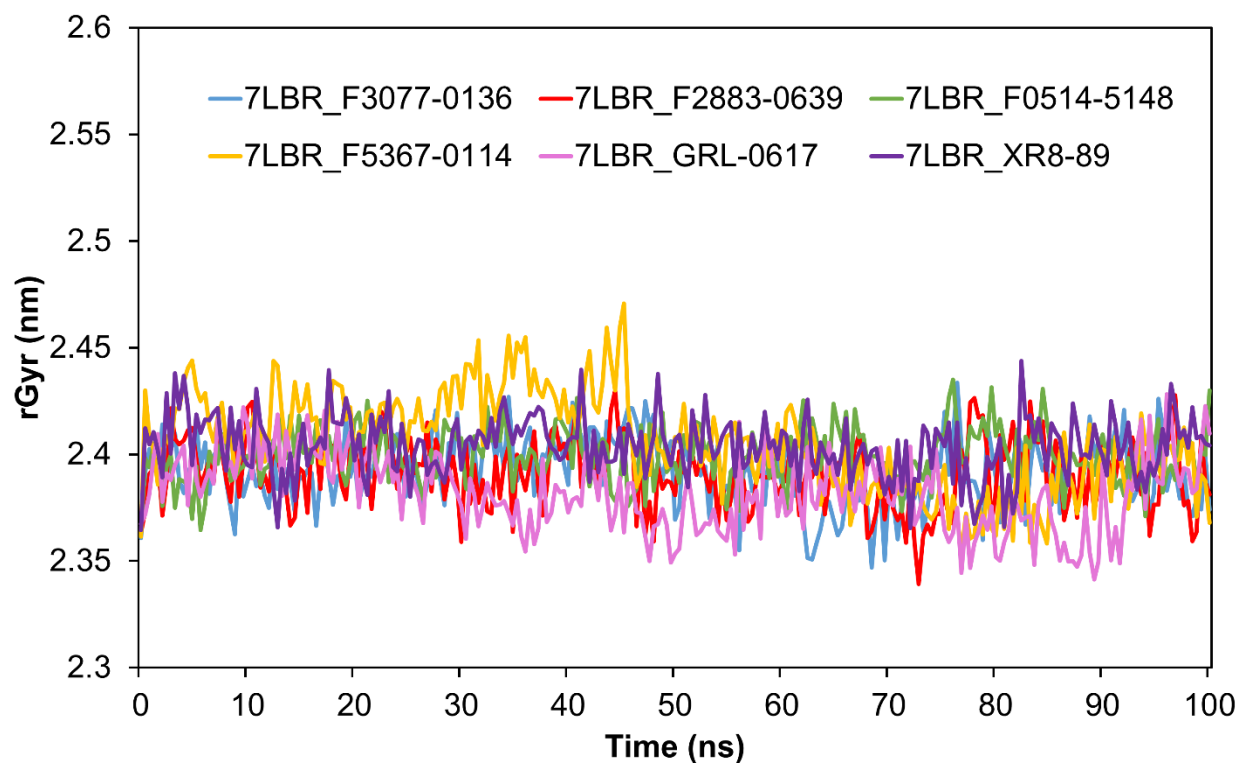

**Figure S6** The comparison of the radius of gyration (rGyr) of protein-ligand complexes. The blue, red, green, yellow, pink, and purple lines represent the energies of complexes: 7LBR\_F3077-0136, 7LBR\_F2883-0639, 7LBR\_F0514-5148, 7LBR\_F5367-0114, 7LBR\_GRL-0617, and the cocrystal structure 7LBR\_XR8-89, respectively.



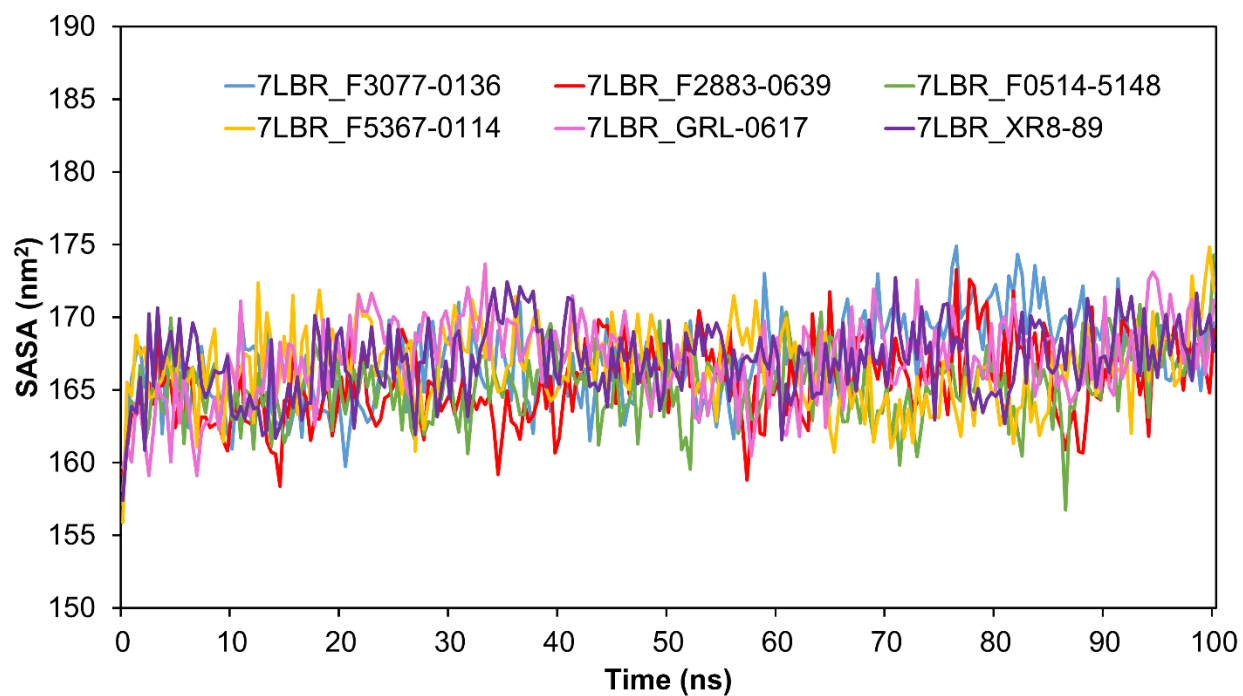

**Figure S7** The comparison of the solvent accessible surface area (SASA) of protein-ligand complexes. The blue, red, green, yellow, pink, and purple lines represent the energies of complexes: 7LBR\_F3077-0136, 7LBR\_F2883-0639, 7LBR\_F0514-5148, 7LBR\_F5367-0114, 7LBR\_GRL-0617, and the cocrystal structure 7LBR\_XR8-89, respectively.

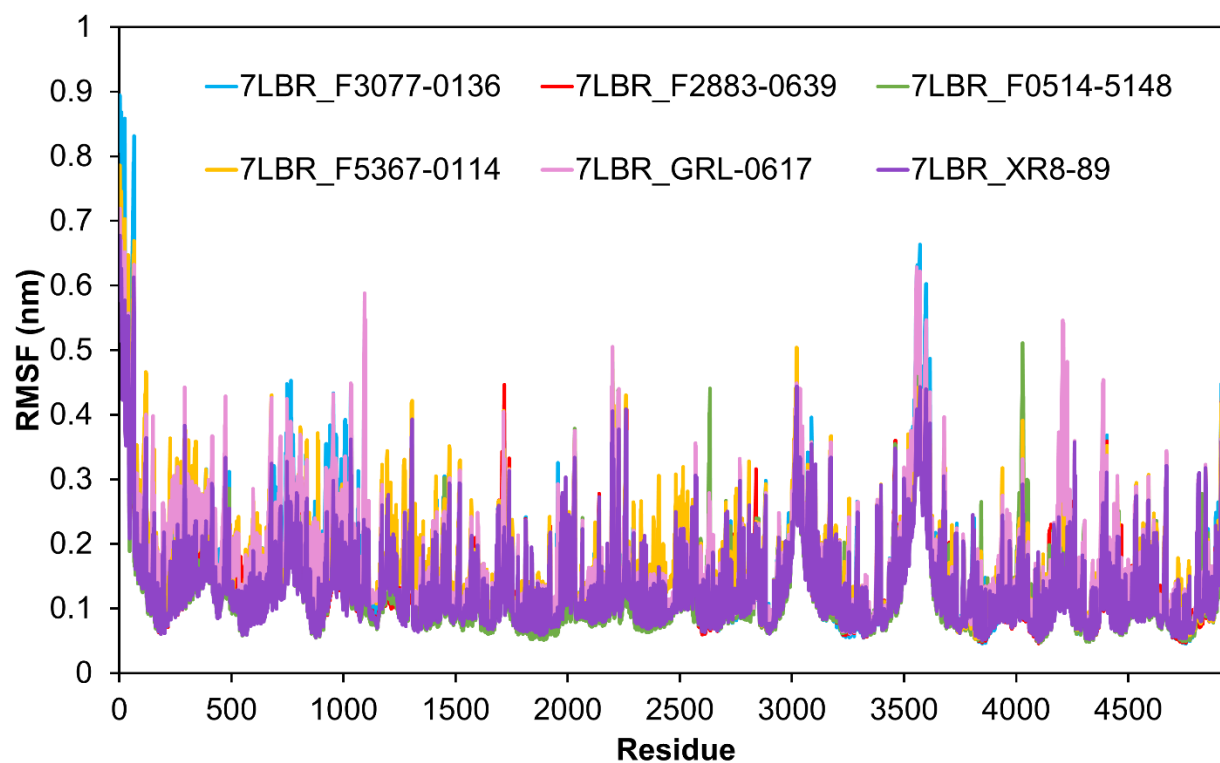

**Figure S8** The comparison of the root-mean-square fluctuation (RMSF) of protein-ligand complexes. The blue, red, green, yellow, pink, and purple lines represent the energies of complexes: 7LBR\_F3077-0136, 7LBR\_F2883-0639, 7LBR\_F0514-5148, 7LBR\_F5367-0114, 7LBR\_GRL-0617, and the cocrystal structure 7LBR\_XR8-89, respectively.
